# Supplementary material for: Socioeconomic correlates of SARS-CoV-2 and influenza H1N1 outbreaks
Source: PubMed Central journal article supplement — Eur Respir J. 2020 Sep 17;56(3):2001400. doi: 10.1183/13993003.01400-2020 (PMC7366181; doi:10.1183/13993003.01400-2020), 2020-09-17
Supplement: ERJ-01400-2020.Shareable.pdf [file ERJ-01400-2020.Shareable.pdf]

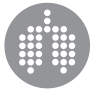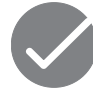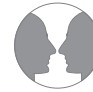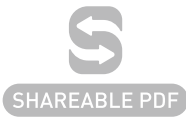

# Socioeconomic correlates of SARS-CoV-2 and influenza H1N1 outbreaks

Jan Christian Kaiser<sup>1</sup> and Georgios T. Stathopoulos <sup>2</sup>

**Affiliations:** <sup>1</sup>Institute of Radiation Medicine (IRM), Helmholtz Center Munich for Environmental Health (Helmholtz Zentrum München für Gesundheit und Umwelt, HMGU), Oberschleissheim, Germany. <sup>2</sup>Comprehensive Pneumology Center (CPC) and Institute for Lung Biology and Disease (iLBD), Helmholtz Center Munich for Environmental Health (Helmholtz Zentrum München für Gesundheit und Umwelt, HMGU); and German Center for Lung Research (Deutsches Zentrum für Lungenforschung, DZL), Neuherberg, Germany.

**Correspondence:** Georgios T. Stathopoulos, Comprehensive Pneumology Center, Helmholtz Zentrum München; Max-Lebsche-Platz 31, 81377 Munich, Germany. E-mail: stathopoulos@helmholtz-muenchen.de

 @ERSpublications

**Geographic disease patterns of the SARS-CoV-2 and the H1N1 influenza pandemics are cross-examined with socioeconomic indices, revealing that the two outbreaks are fundamentally different and that SARS-CoV-2 spread is linked with economic output** <https://bit.ly/3fqkiyp>

**Cite this article as:** Kaiser JC, Stathopoulos GT. Socioeconomic correlates of SARS-CoV-2 and influenza H1N1 outbreaks. *Eur Respir J* 2020; 56: 2001400 [<https://doi.org/10.1183/13993003.01400-2020>].

This single-page version can be shared freely online.

*To the Editor:*

The severe acute respiratory syndrome coronavirus 2 (SARS-CoV-2) outbreak has disrupted social and economic life over large parts of the world [1]. The countermeasures designed and enforced by organisations and governments in order to contain the pandemic have had debated impact on its spread, but especially on societal structure and economic output [2]. In a fashion only preceded by war, an infectious pandemic challenges vulnerabilities of our societal structure, economic activity and healthcare [3]. While the battle for the discovery of the disease's origins, pathogenesis and cure is ongoing, a deeper understanding of its pattern of spread is sought [4]. Geographic patterns of disease burden are essential in understanding our societal and biological vulnerabilities to disease, as well as the progress of our worldwide battle against disease [5]. To this end, the way the SARS-CoV-2 pandemic has affected different countries could provide valuable clues to the nature of the disease, as well as our societal and economic weaknesses that propagate it.
